# Supplementary material for: Acute Exercise and Appetite-Regulating Hormones in Overweight and Obese Individuals: A Meta-Analysis
Source: Hindawi journal article supplement (doi:10.1155/2016/2643625), 2016-01-01
Supplement: f1 [file 2643625.f1.pdf]

1 **Supplementary material**

2 Search strategy

3 **Keywords**

| <i>Study Population</i> | <i>Intervention</i>                                                                                            |
|-------------------------|----------------------------------------------------------------------------------------------------------------|
| Obese                   | Exercise; Physical exercise; Aerobic exercise                                                                  |
| Overweight              | Physical activity                                                                                              |
|                         | Energy expenditure                                                                                             |
|                         | Energy intake; Caloric intake                                                                                  |
|                         | Food intake                                                                                                    |
|                         | Appetite                                                                                                       |
|                         | Hunger                                                                                                         |
|                         | Appetite hormones; Appetite regulating hormones                                                                |
|                         | Ghrelin; Acylated ghrelin; Total ghrelin; Acyl ghrelin                                                         |
|                         | Peptide YY; PYY; Peptide YY 3-36; PYY3-36; PYY (3-36); Total PYY                                               |
|                         | Glucagon like peptide 1; Glucagon-like peptide-1; GLP-1; total GLP-1; active GLP-1; GLP-1 (7-36); GLP-1 (9-36) |

4

- 5 I. Obese or overweight
- 6 II. Exercise or physical exercise or aerobic exercise or physical activity or energy expenditure
- 7 III. Energy intake or caloric intake or food intake
- 8 IV. Appetite regulatory hormones or appetite hormones
- 9 V. Peptide YY or PYY or Peptide YY 3-36 or PYY3-36 or PYY (3-36) or Total PYY
- 10 VI. Ghrelin or Acylated ghrelin or Total ghrelin or Acyl ghrelin
- 11 VII. Glucagon like peptide 1 or Glucagon-like peptide-1 or GLP-1 or total GLP-1 or active GLP-1
- 12 or GLP-1 (7-36) or GLP-1 (9-36)
- 13 VIII. Obese or overweight and Exercise or physical exercise or aerobic exercise or physical activity
- 14 or energy expenditure (I and II)
- 15 IX. Obese or overweight and Energy intake or caloric intake or food intake (I and III)
- 16 X. Obese or overweight and Appetite regulatory hormones or appetite hormones (I and IV)
- 17 XI. Obese or overweight and Peptide YY or PYY or Peptide YY 3-36 or PYY3-36 or PYY (3-36)
- 18 or Total PYY (I and V)
- 19 XII. Obese or overweight and Ghrelin or Acylated ghrelin or Total ghrelin or Acyl ghrelin (I and VI)
- 20 XIII. Obese or overweight and Glucagon like peptide 1 or Glucagon-like peptide-1 or GLP-1 or
- 21 total GLP-1 or active GLP-1 or GLP-1 (7-36) or GLP-1 (9-36) (I and VII)
- 22 XIV. Obese or overweight and Exercise or physical exercise or aerobic exercise or physical activity
- 23 or energy expenditure and Energy intake or caloric intake or food intake (I and II and III)
- 24 XV. Obese or overweight and Exercise or physical exercise or aerobic exercise or physical activity
- 25 or energy expenditure and Appetite regulatory hormones or appetite hormones (I and II and
- 26 IV)
- 27 XVI. Obese or overweight and Exercise or physical exercise or aerobic exercise or physical activity
- 28 or energy expenditure and Peptide YY or PYY or Peptide YY 3-36 or PYY3-36 or PYY (3-36)
- 29 or Total PYY (I and II and V)
- 30 XVII. Obese or overweight and Exercise or physical exercise or aerobic exercise or physical activity
- 31 or energy expenditure and Ghrelin or Acylated ghrelin or Total ghrelin or Acyl ghrelin (I and II
- 32 and VI)
- 33 XVIII. Obese or overweight and Exercise or physical exercise or aerobic exercise or physical activity
- 34 or energy expenditure and Glucagon like peptide 1 or Glucagon-like peptide-1 or GLP-1 or
- 35 total GLP-1 or active GLP-1 or GLP-1 (7-36) or GLP-1 (9-36) (I and II and VII)

- 36 XIX. Obese or overweight (RCT filter)
- 37 XX. Exercise or physical exercise or aerobic exercise or physical activity or energy expenditure
- 38 (RCT filter)
- 39 XXI. Energy intake or caloric intake or food intake (RCT filter)
- 40 XXII. Appetite regulatory hormones or appetite hormones (RCT filter)
- 41 XXIII. Peptide YY or PYY or Peptide YY 3-36 or PYY3-36 or PYY (3-36) or Total PYY (RCT filter)
- 42 XXIV. Ghrelin or Acylated ghrelin or Total ghrelin or Acyl ghrelin (RCT filter)
- 43 XXV. Glucagon like peptide 1 or Glucagon-like peptide-1 or GLP-1 or total GLP-1 or active GLP-1
- 44 or GLP-1 (7-36) or GLP-1 (9-36) (RCT filter)
- 45 XXVI. Obese or overweight and Exercise or physical exercise or aerobic exercise or physical activity
- 46 or energy expenditure (I and II) (RCT filter)
- 47 XXVII. Obese or overweight and Energy intake or caloric intake or food intake (I and III) (RCT filter)
- 48 XXVIII. Obese or overweight and Appetite regulatory hormones or appetite hormones (I and IV) (RCT
- 49 filter)
- 50 XXIX. Obese or overweight and Peptide YY or PYY or Peptide YY 3-36 or PYY3-36 or PYY (3-36)
- 51 or Total PYY (I and V) (RCT filter)
- 52 XXX. Obese or overweight and Ghrelin or Acylated ghrelin or Total ghrelin or Acyl ghrelin (I and VI)
- 53 (RCT filter)
- 54 XXXI. Obese or overweight and Glucagon like peptide 1 or Glucagon-like peptide-1 or GLP-1 or
- 55 total GLP-1 or active GLP-1 or GLP-1 (7-36) or GLP-1 (9-36) (I and VII) (RCT filter)
- 56 XXXII. Obese or overweight and Exercise or physical exercise or aerobic exercise or physical activity
- 57 or energy expenditure and Energy intake or caloric intake or food intake (I and II and III) (RCT
- 58 filter)
- 59 XXXIII. Obese or overweight and Exercise or physical exercise or aerobic exercise or physical activity
- 60 or energy expenditure and Appetite regulatory hormones or appetite hormones (I and II and
- 61 IV) (RCT filter)
- 62 XXXIV. Obese or overweight and Exercise or physical exercise or aerobic exercise or physical activity
- 63 or energy expenditure and Peptide YY or PYY or Peptide YY 3-36 or PYY3-36 or PYY (3-36)
- 64 or Total PYY (I and II and V) (RCT filter)
- 65 XXXV. Obese or overweight and Exercise or physical exercise or aerobic exercise or physical activity
- 66 or energy expenditure and Ghrelin or Acylated ghrelin or Total ghrelin or Acyl ghrelin (I and II
- 67 and VI) (RCT filter)
- 68 XXXVI. Obese or overweight and Exercise or physical exercise or aerobic exercise or physical activity
- 69 or energy expenditure and Glucagon like peptide 1 or Glucagon-like peptide-1 or GLP-1 or
- 70 total GLP-1 or active GLP-1 or GLP-1 (7-36) or GLP-1 (9-36) (I and II and VII) (RCT filter)

71 **Table S1.** Individual study characteristics for studies evaluating acylated ghrelin

| Study                        | Category         | Standard difference<br>in means | Standard<br>error | Variance | Lower 95%<br>confidence interval | Upper 95%<br>confidence interval | Z- value | p-value | Weight (%) |
|------------------------------|------------------|---------------------------------|-------------------|----------|----------------------------------|----------------------------------|----------|---------|------------|
| Gholipour, M.                | Overweight/obese | -1.517                          | 0.183             | 0.033    | -1.876                           | -1.159                           | -8.295   | 0.000   | 8.303      |
| Martins, S. A                | Overweight/obese | -0.468                          | 0.114             | 0.013    | -0.691                           | -0.245                           | -4.115   | 0.000   | 10.064     |
| Martins, S. B                | Overweight/obese | -0.456                          | 0.113             | 0.013    | -0.678                           | -0.234                           | -4.019   | 0.000   | 10.070     |
| Martins, S. C                | Overweight/obese | -0.284                          | 0.110             | 0.012    | -0.500                           | -0.069                           | -2.582   | 0.010   | 10.148     |
| Sim, A. A                    | Overweight/obese | -0.032                          | 0.091             | 0.008    | -0.210                           | 0.146                            | -0.353   | 0.724   | 10.578     |
| Sim, A. B                    | Overweight/obese | -0.201                          | 0.092             | 0.008    | -0.381                           | -0.021                           | -2.193   | 0.028   | 10.559     |
| Sim, A. C                    | Overweight/obese | -0.325                          | 0.093             | 0.009    | -0.507                           | -0.142                           | -3.490   | 0.000   | 10.529     |
| Tiryaki-Sonmez, G.           | Overweight/obese | -0.367                          | 0.129             | 0.017    | -0.619                           | -0.114                           | -2.847   | 0.004   | 9.697      |
| Ueda, S.-y.                  | Overweight/obese | 0.082                           | 0.142             | 0.020    | -0.196                           | 0.359                            | 0.577    | 0.564   | 9.374      |
| Unick, J.L.                  | Overweight/obese | -0.047                          | 0.086             | 0.007    | -0.216                           | 0.121                            | -0.552   | 0.581   | 10.678     |
| Mean                         |                  | -0.340                          | 0.099             | 0.010    | -0.533                           | -0.146                           | -3.443   | 0.001   | 100        |
| Broom et al. 2007            | Lean             | -0.253                          | 0.127             | 0.016    | -0.501                           | -0.004                           | -1.994   | 0.046   | 4.290      |
| Broom et al. 2009            | Lean             | -0.085                          | 0.113             | 0.013    | -0.307                           | 0.136                            | -0.753   | 0.451   | 4.427      |
| Broom et al. 2009-1          | Lean             | -0.125                          | 0.113             | 0.013    | -0.347                           | 0.097                            | -1.104   | 0.269   | 4.424      |
| Shorten et al. 2009          | Lean             | -0.172                          | 0.114             | 0.013    | -0.395                           | 0.051                            | -1.512   | 0.131   | 4.421      |
| Ueda et al. 2009a            | Lean             | 0.701                           | 0.158             | 0.025    | 0.391                            | 1.010                            | 4.439    | 0.000   | 3.960      |
| King et al. 2010b            | Lean             | -0.620                          | 0.136             | 0.019    | -0.887                           | -0.353                           | -4.553   | 0.000   | 4.192      |
| King et al. 2010a            | Lean             | -0.023                          | 0.100             | 0.010    | -0.219                           | 0.173                            | -0.233   | 0.816   | 4.549      |
| Balaguera-Cortes et al. 2011 | Lean             | 0.023                           | 0.118             | 0.014    | -0.209                           | 0.255                            | 0.197    | 0.844   | 4.374      |

|                                |      |        |       |       |        |        |        |       |       |
|--------------------------------|------|--------|-------|-------|--------|--------|--------|-------|-------|
| Balaguera-Cortes et al. 2011-1 | Lean | -0.476 | 0.125 | 0.016 | -0.721 | -0.231 | -3.813 | 0.000 | 4.309 |
| King et al. 2011a              | Lean | -0.100 | 0.108 | 0.012 | -0.312 | 0.112  | -0.924 | 0.355 | 4.472 |
| King et al. 2011b              | Lean | -0.047 | 0.100 | 0.010 | -0.243 | 0.149  | -0.468 | 0.640 | 4.549 |
| Vatansever-Ozen, 2011          | Lean | -0.672 | 0.131 | 0.017 | -0.929 | -0.415 | -5.129 | 0.000 | 4.246 |
| Becker et al. 2012             | Lean | -0.437 | 0.138 | 0.019 | -0.708 | -0.165 | -3.155 | 0.002 | 4.168 |
| Kelly et al. 2012              | Lean | -0.106 | 0.119 | 0.014 | -0.339 | 0.126  | -0.896 | 0.370 | 4.371 |
| Larson Meyer et al. 2012       | Lean | 0.631  | 0.137 | 0.019 | 0.363  | 0.899  | 4.621  | 0.000 | 4.187 |
| Larson Meyer et al. 2012a      | Lean | 0.123  | 0.119 | 0.014 | -0.110 | 0.356  | 1.036  | 0.300 | 4.370 |
| Wasse et al. 2012              | Lean | -0.181 | 0.119 | 0.014 | -0.415 | 0.053  | -1.515 | 0.130 | 4.365 |
| Wasse et al. 2013-1            | Lean | -0.407 | 0.117 | 0.014 | -0.637 | -0.176 | -3.463 | 0.001 | 4.384 |
| Wasse et al. 2013              | Lean | -0.412 | 0.117 | 0.014 | -0.642 | -0.181 | -3.502 | 0.000 | 4.383 |
| Deighton et al. 2013           | Lean | -0.427 | 0.113 | 0.013 | -0.648 | -0.206 | -3.785 | 0.000 | 4.428 |
| Deighton et al. 2013-1         | Lean | -0.700 | 0.121 | 0.015 | -0.936 | -0.464 | -5.808 | 0.000 | 4.353 |
| Hagobian et al. 2013           | Lean | 0.270  | 0.115 | 0.013 | 0.044  | 0.495  | 2.347  | 0.019 | 4.409 |
| Hagobian et al. 2013-1         | Lean | -0.119 | 0.119 | 0.014 | -0.352 | 0.113  | -1.004 | 0.315 | 4.370 |
| Mean                           |      | -0.159 | 0.067 | 0.005 | -0.291 | -0.027 | -2.358 | 0.018 | 100   |

72

73

74

75

76 **Table S2.** Individual study characteristics for studies evaluating total PYY

| Study                         | Category         | Standard difference<br>in means | Standard<br>error | Variance | Lower 95%<br>confidence interval | Upper 95%<br>confidence interval | Z- value | p-value | Weight (%) |
|-------------------------------|------------------|---------------------------------|-------------------|----------|----------------------------------|----------------------------------|----------|---------|------------|
| Sim, A. A                     | Overweight/obese | 0.034                           | 0.185             | 0.034    | -0.328                           | 0.396                            | 0.186    | 0.853   | 29.296     |
| Sim, A. B                     | Overweight/obese | -0.052                          | 0.185             | 0.034    | -0.414                           | 0.310                            | -0.281   | 0.779   | 29.280     |
| Sim, A. C                     | Overweight/obese | 0.078                           | 0.185             | 0.034    | -0.285                           | 0.441                            | 0.422    | 0.673   | 29.245     |
| Ueda, S.-y.                   | Overweight/obese | 0.666                           | 0.318             | 0.101    | 0.042                            | 1.289                            | 2.092    | 0.036   | 12.179     |
| Mean                          |                  | 0.099                           | 0.118             | 0.014    | -0.133                           | 0.331                            | 0.835    | 0.404   | 100        |
| Martins et al. 2007           | Lean             | 0.056                           | 0.311             | 0.097    | -0.553                           | 0.666                            | 0.181    | 0.856   | 4.857      |
| Broom et al. 2009a            | Lean             | 0.647                           | 0.253             | 0.064    | 0.152                            | 1.142                            | 2.564    | 0.010   | 7.373      |
| Broom et al. 2009b            | Lean             | -0.086                          | 0.230             | 0.053    | -0.537                           | 0.365                            | -0.375   | 0.707   | 8.885      |
| Shorten et al. 2009           | Lean             | 0.165                           | 0.231             | 0.053    | -0.288                           | 0.619                            | 0.716    | 0.474   | 8.798      |
| Ueda et al. 2009a             | Lean             | 0.465                           | 0.303             | 0.092    | -0.129                           | 1.058                            | 1.533    | 0.125   | 5.122      |
| Balaguera-Cortes et al. 2011a | Lean             | 0.085                           | 0.241             | 0.058    | -0.388                           | 0.558                            | 0.354    | 0.723   | 8.078      |
| Balaguera-Cortes et al. 2011b | Lean             | -0.133                          | 0.242             | 0.059    | -0.607                           | 0.341                            | -0.549   | 0.583   | 8.037      |
| Kelly et al. 2012             | Lean             | 0.153                           | 0.242             | 0.059    | -0.321                           | 0.628                            | 0.633    | 0.527   | 8.013      |
| Larson Meyer et al. 2012a     | Lean             | 0.023                           | 0.254             | 0.064    | -0.474                           | 0.521                            | 0.093    | 0.926   | 7.295      |
| Larson Meyer et al. 2012b     | Lean             | 0.553                           | 0.259             | 0.067    | 0.046                            | 1.059                            | 2.137    | 0.033   | 7.034      |
| Wasse et al. 2013             | Lean             | 0.236                           | 0.244             | 0.060    | -0.242                           | 0.715                            | 0.968    | 0.333   | 7.888      |
| Deighton et al. 2012a         | Lean             | 0.337                           | 0.226             | 0.051    | -0.106                           | 0.780                            | 1.493    | 0.135   | 9.205      |
| Deighton et al. 2012b         | Lean             | 0.259                           | 0.223             | 0.050    | -0.179                           | 0.697                            | 1.158    | 0.247   | 9.414      |
| Mean                          |                  | 0.204                           | 0.069             | 0.005    | 0.070                            | 0.339                            | 2.979    | 0.003   | 100        |

78 **Table S3.** Individual study characteristics for studies evaluating total GLP-1

| Study                     | Category         | Standard difference<br>in means | Standard<br>error | Variance | Lower 95%<br>confidence interval | Upper 95%<br>confidence interval | Z- value | p-value | Weight (%) |
|---------------------------|------------------|---------------------------------|-------------------|----------|----------------------------------|----------------------------------|----------|---------|------------|
| Martins, S. A             | Overweight/obese | 0.066                           | 0.100             | 0.010    | -0.131                           | 0.262                            | 0.655    | 0.512   | 24.108     |
| Martins, S. B             | Overweight/obese | 0.146                           | 0.101             | 0.010    | -0.051                           | 0.343                            | 1.450    | 0.147   | 24.033     |
| Martins, S. C             | Overweight/obese | -0.087                          | 0.100             | 0.010    | -0.284                           | 0.109                            | -0.872   | 0.383   | 24.093     |
| Unick, J.L.               | Overweight/obese | -0.200                          | 0.080             | 0.006    | -0.358                           | -0.043                           | -2.497   | 0.013   | 27.765     |
| Mean                      |                  |                                 |                   |          |                                  |                                  |          |         | 100        |
| Martins et al. 2007       | Lean             | 0.628                           | 0.155             | 0.024    | 0.325                            | 0.932                            | 4.060    | 0.000   | 13.908     |
| Ueda et al. 2009a         | Lean             | 0.381                           | 0.136             | 0.018    | 0.116                            | 0.647                            | 2.813    | 0.005   | 15.608     |
| Ueda et al. 2009b         | Lean             | 0.518                           | 0.117             | 0.014    | 0.290                            | 0.747                            | 4.442    | 0.000   | 17.441     |
| Ueda et al. 2009b-1       | Lean             | 0.518                           | 0.117             | 0.014    | 0.290                            | 0.747                            | 4.443    | 0.000   | 17.441     |
| Larson Meyer et al. 2012  | Lean             | 0.155                           | 0.116             | 0.013    | -0.072                           | 0.383                            | 1.336    | 0.182   | 17.492     |
| Larson Meyer et al. 2012a | Lean             | 0.136                           | 0.110             | 0.012    | -0.079                           | 0.352                            | 1.239    | 0.215   | 18.109     |
| Mean                      |                  |                                 |                   |          |                                  |                                  |          |         | 100        |

79

80

81

82

83

84 **Table S4.** Individual study characteristics for studies evaluating insulin

| Study         | Category         | Standard difference<br>in means | Standard<br>error | Variance | Lower 95%<br>confidence interval | Upper 95%<br>confidence interval | Z- value | p-value | Weight (%) |
|---------------|------------------|---------------------------------|-------------------|----------|----------------------------------|----------------------------------|----------|---------|------------|
| Martins, S. A | Overweight/obese | -0.698                          | 0.241             | 0.058    | -1.171                           | -0.226                           | -2.899   | 0.004   | 13.517     |
| Martins, S. B | Overweight/obese | -0.275                          | 0.220             | 0.048    | -0.706                           | 0.156                            | -1.249   | 0.212   | 13.986     |
| Martins, S. C | Overweight/obese | -0.087                          | 0.216             | 0.047    | -0.512                           | 0.337                            | -0.404   | 0.686   | 14.066     |
| Sim, A. A     | Overweight/obese | 0.384                           | 0.188             | 0.035    | 0.015                            | 0.752                            | 2.040    | 0.041   | 14.677     |
| Sim, A. B     | Overweight/obese | 0.226                           | 0.184             | 0.034    | -0.134                           | 0.586                            | 1.230    | 0.219   | 14.766     |
| Sim, A. C     | Overweight/obese | 0.352                           | 0.187             | 0.035    | -0.014                           | 0.719                            | 1.883    | 0.060   | 14.698     |
| Ueda, S-y.    | Overweight/obese | -0.942                          | 0.206             | 0.043    | -1.346                           | -0.537                           | -4.566   | 0.000   | 14.289     |
| Mean          |                  | -0.138                          | 0.197             | 0.039    | -0.524                           | 0.248                            | -0.702   | 0.483   | 100        |

85

86

87

88
